# Supplementary material for: Efficacy, Safety, and Pharmacokinetics of AZD7442 (Tixagevimab/Cilgavimab) for Prevention of Symptomatic COVID-19: 15-Month Final Analysis of the PROVENT and STORM CHASER Trials
Source: PubMed Central journal article supplement — Infect Dis Ther. 2024 May 4;13(6):1253–68. doi: 10.1007/s40121-024-00970-x (PMC11128422; doi:10.1007/s40121-024-00970-x), 2024-05-04
Supplement: 40121_2024_970_MOESM1_ESM.pdf [file 40121_2024_970_MOESM1_ESM.pdf]

# Efficacy, Safety, and Pharmacokinetics of AZD7442 (Tixagevimab/Cilgavimab) for Prevention of Symptomatic COVID-19: 15-Month Final Analysis of the PROVENT and STORM CHASER Trials

Myron J. Levin, Andrew Ustianowski, Stephane De Wit, Rohini Beavon, Jesse Thissen, Seth Seegobin, Kanika Dey, Karen A. Near, Katie Streicher, Alexandre Kiazand, Mark T. Esser

## PROVENT and STORM CHASER phase 3 trials assessed AZD7442 (tixagevimab/cilgavimab) for prevention of symptomatic COVID-19

### PROVENT: Pre-exposure prophylaxis

Predicted to be poor vaccine responders or at increased SARS-CoV-2 exposure risk

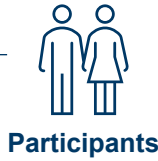

### STORM CHASER: Post-exposure prophylaxis

Potential exposure within 8 days to an individual with SARS-CoV-2 infection

Randomized 2:1

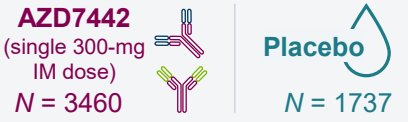

Randomized 2:1

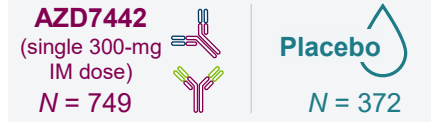

## Safety of AZD7442 was similar to placebo over 15 months

### PROVENT

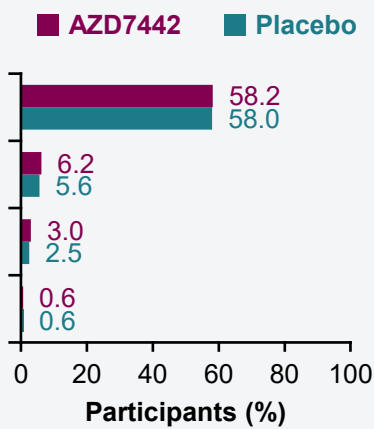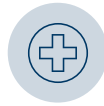

AEs  
SAEs  
AESIs  
Deaths

### STORM CHASER

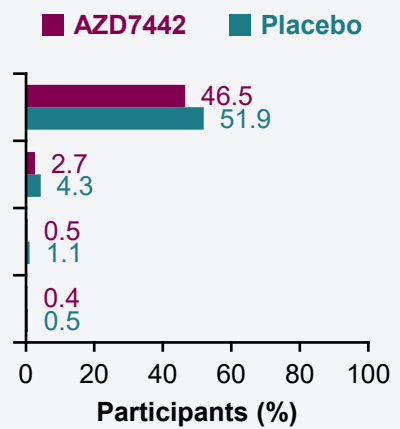

## AZD7442 as pre-exposure prophylaxis protected against symptomatic and severe COVID-19

### PROVENT

| Primary analysis | Day 183 | Day 366 |
|------------------|---------|---------|
|                  | 76.7%** | 46.3%** |
|                  | 83.0%** |         |

91.4%\*\* RRR in severe/critical COVID-19 by day 366<sup>a</sup>

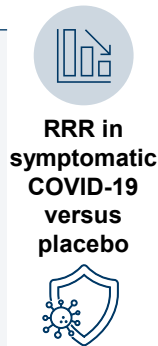

### STORM CHASER

| Primary analysis | Day 183 | Day 366 |
|------------------|---------|---------|
|                  | 33.3%   | 3.4%    |
|                  | 43.3%*  |         |

70.2% RRR at day 183 (participants with a negative or missing SARS-CoV-2 RT-PCR status at baseline)

\*p < 0.05, \*\*p < 0.001

AE adverse event, AESI AE of special interest, COVID-19 coronavirus disease 2019, RRR relative risk reduction, RT-PCR reverse transcription-polymerase chain reaction, SAE serious AE, SARS-CoV-2 severe acute respiratory syndrome coronavirus 2

<sup>a</sup>Endpoint not assessed in STORM CHASER due to too few events
